# Supplementary material for: Troger's base functionalized covalent triazine frameworks for CO2 capture
Source: Royal Society of Chemistry journal article supplement (doi:10.1039/c6ra21196h), 2016-01-01
Supplement: c6ra21196h1.pdf [file c6ra21196h1.pdf]

*Electronic Supplementary Information for*

**Troger's Base Functionalized Covalent Triazine Frameworks for CO<sub>2</sub> Capture**

Liming Tao<sup>a</sup>, Fang Niu<sup>b</sup>, Jingang Liu<sup>c</sup>, Tingmei Wang<sup>a</sup> and Qihua Wang<sup>a\*</sup>

<sup>a</sup> *State Key Laboratory of Solid Lubrication, Lanzhou Institute of Chemical Physics,  
Chinese Academy of Sciences, Lanzhou, Gansu 730000, P.R. China. Fax: 86 0931*

*4968252; Tel: 86 0931 4968252; E-mail: [qhwang@licp.cas.cn](mailto:qhwang@licp.cas.cn).*

<sup>b</sup> *College of Chemistry and Chemical Engineering, Lanzhou University, Lanzhou,  
Gansu 730000, P.R. China. E-mail: [niufang@lzu.edu.cn](mailto:niufang@lzu.edu.cn).*

<sup>c</sup> *School of Materials Sciences and Technology, China University of Geosciences,  
Beijing, 100083, P.R. China. E-mail: [liujg@iccas.ac.cn](mailto:liujg@iccas.ac.cn).*

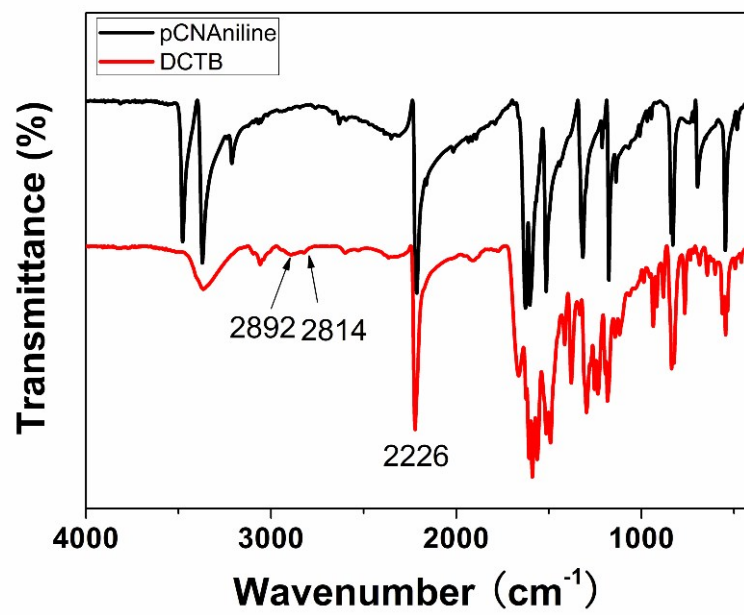

Fig. S1. FT-IR spectra of DCTB and the precursor (KBr pellets)

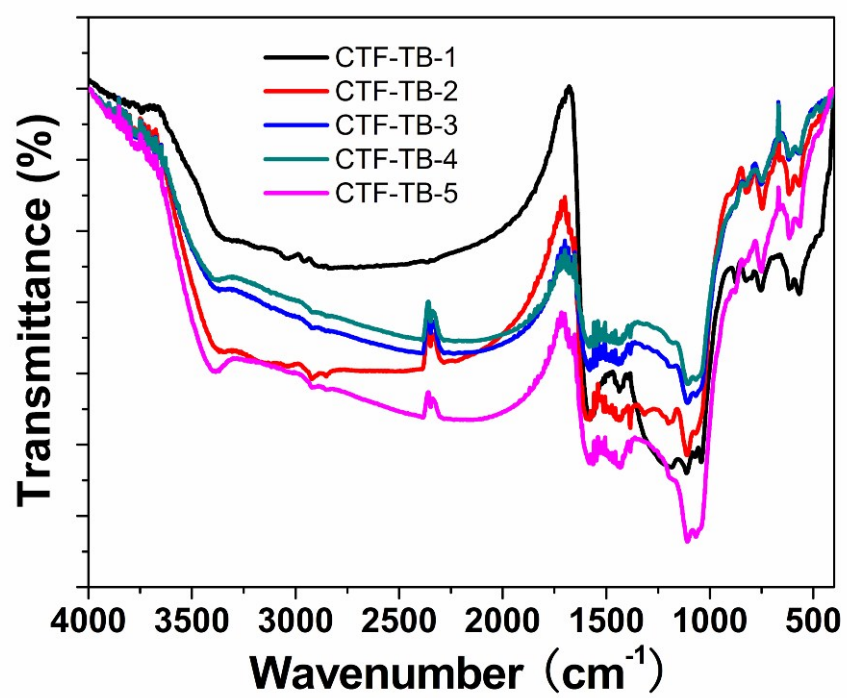

Fig. S2. FT-IR spectra of the CTF-TBs obtained from different ratios of ZnCl<sub>2</sub> to DCTB (KBr pellets)

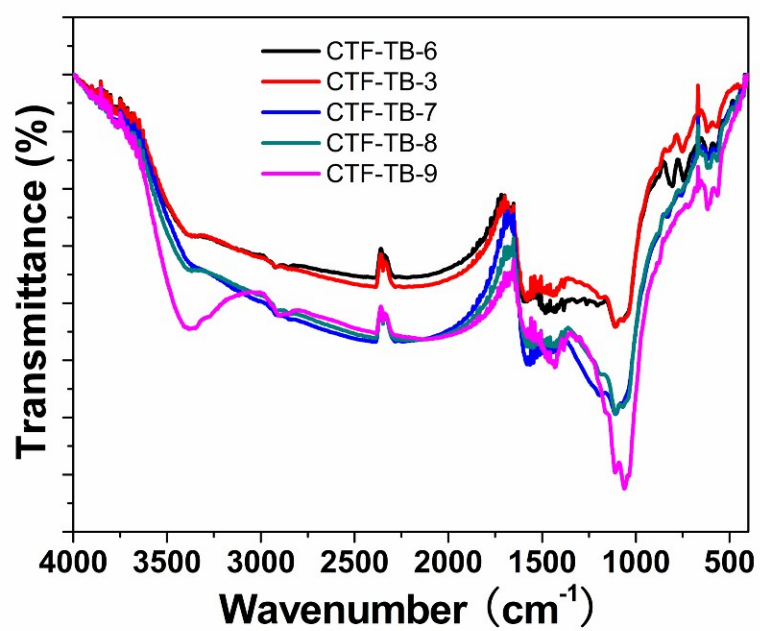

Fig. S3. FT-IR spectra of the CTF-TBs obtained from different reaction temperatures  
(KBr pellets)

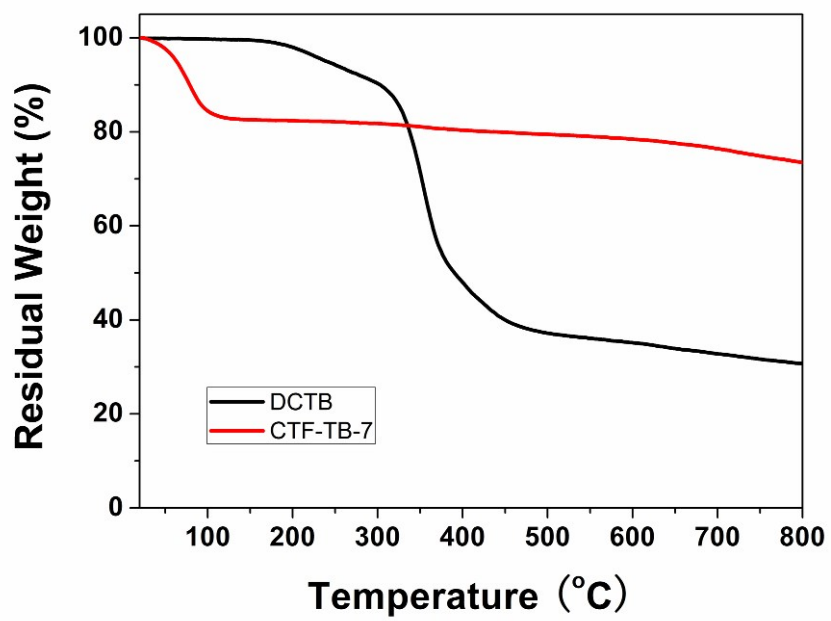

Fig. S4. TGA curve of DCTB and CTF-TB-7 (N<sub>2</sub>, 10 °C /min)

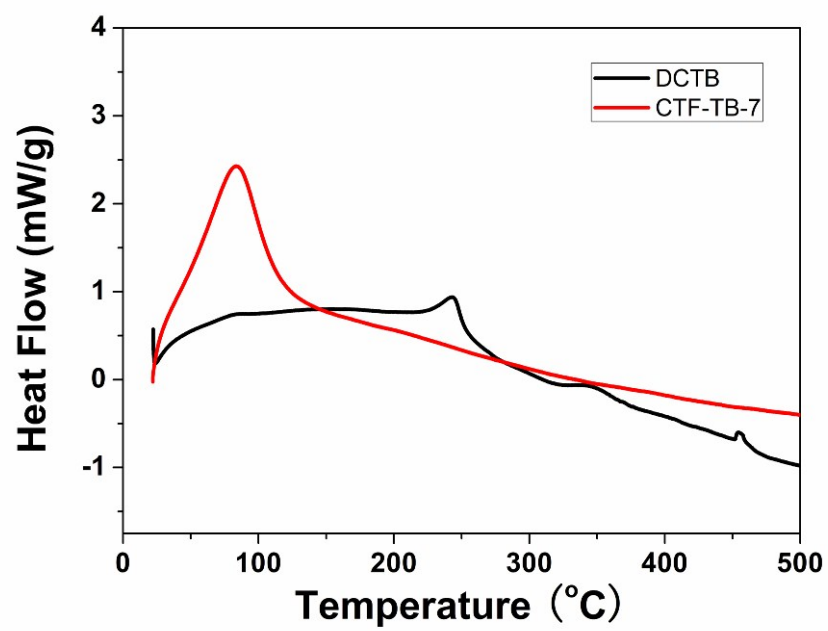

Fig. S5. DSC curves of DCTB and CTF-TB-7 (10 °C/min, N<sub>2</sub>)

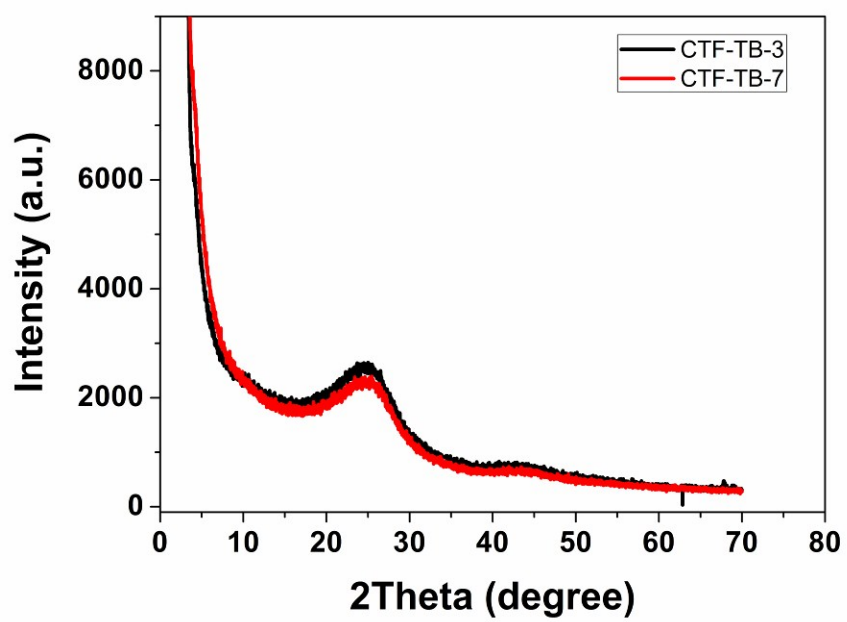

Fig. S6. XRD patterns of CTF-TB-3 and CTF-TB-7

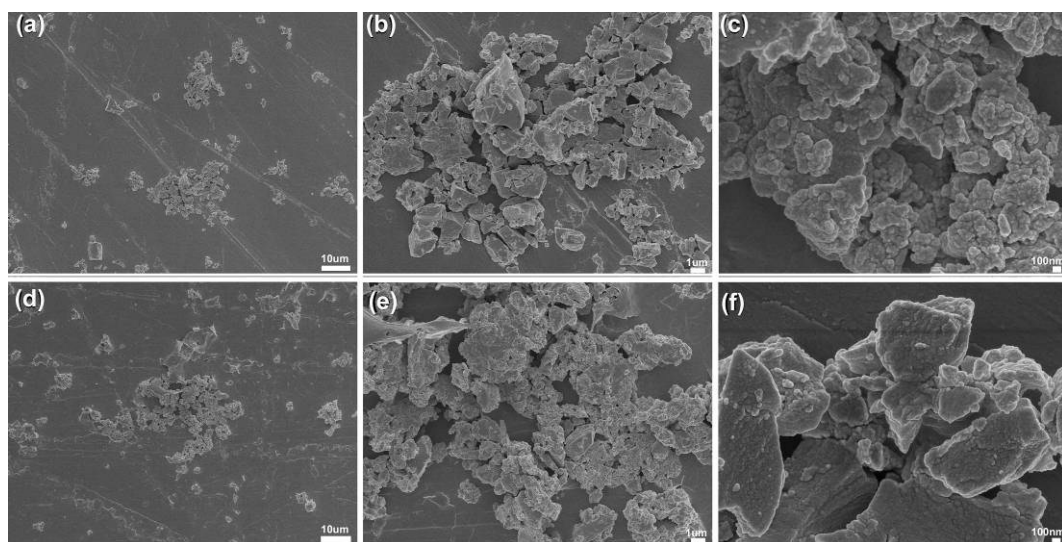

Fig. S7. FESEM images of CTF-TB-3 (a), (b) and (c) and CTF-TB-7 (d), (e) and (f)



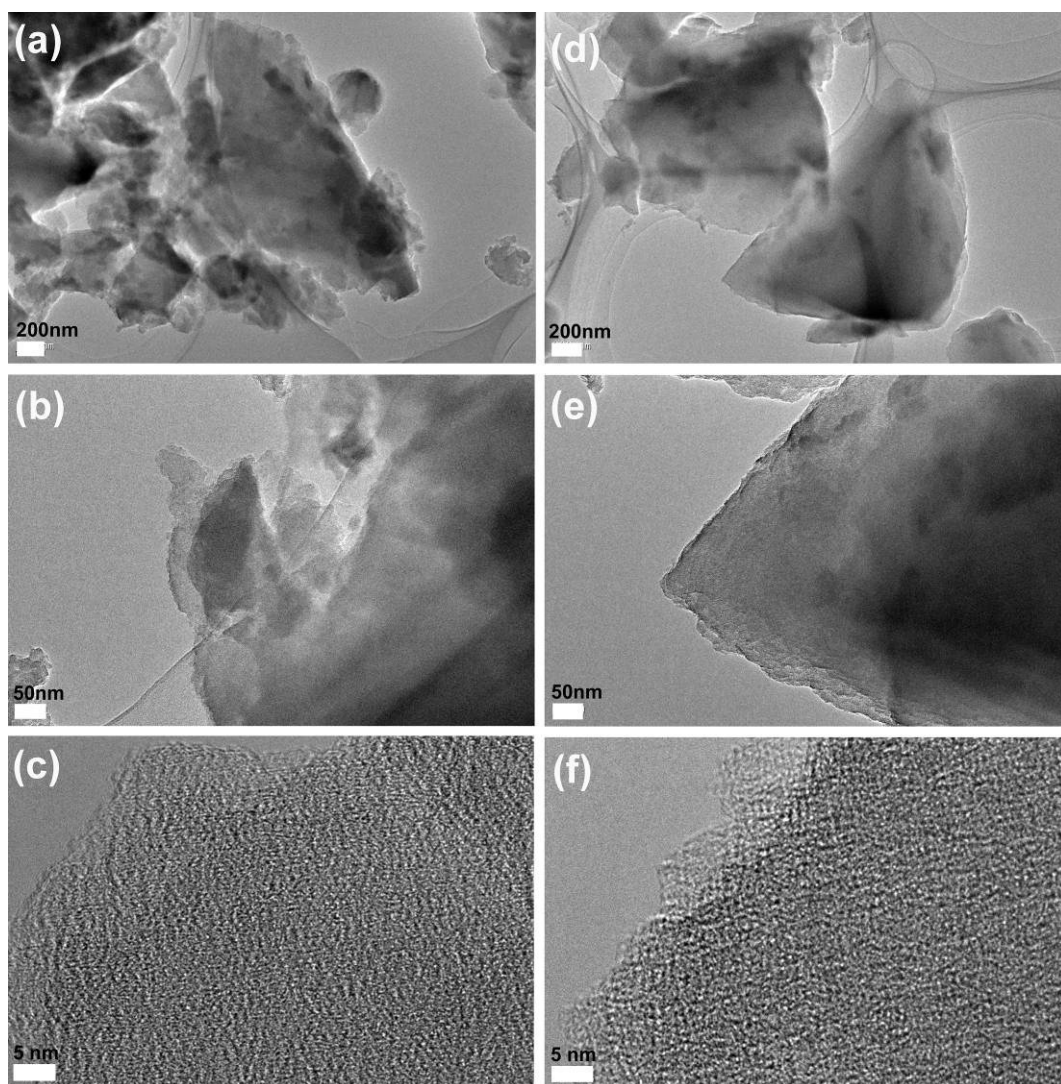

Fig. S8. TEM images of CTF-TB-3 (a), (b) and (c) and CTF-TB-7 (d), (e) and (f)

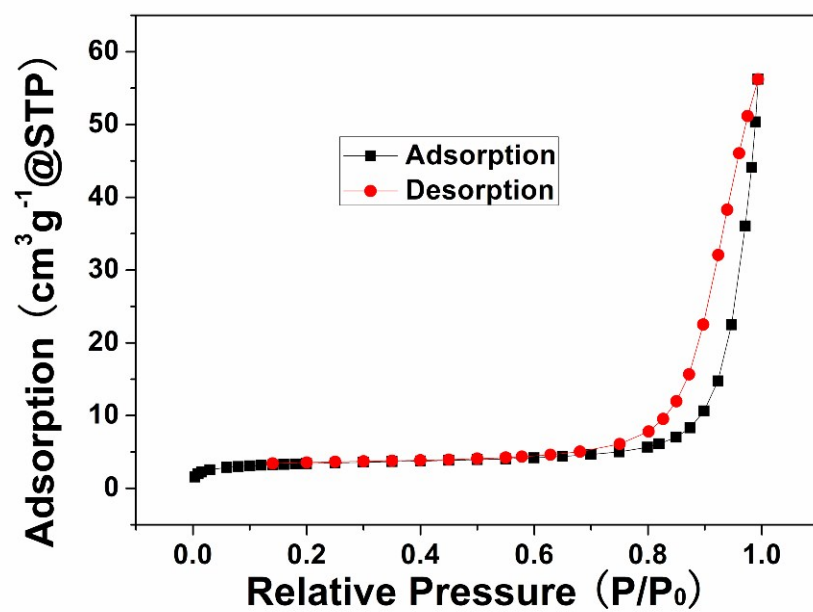

Fig. S9. Nitrogen adsorption and desorption isotherms at 77.3 K for CTF-TB-S

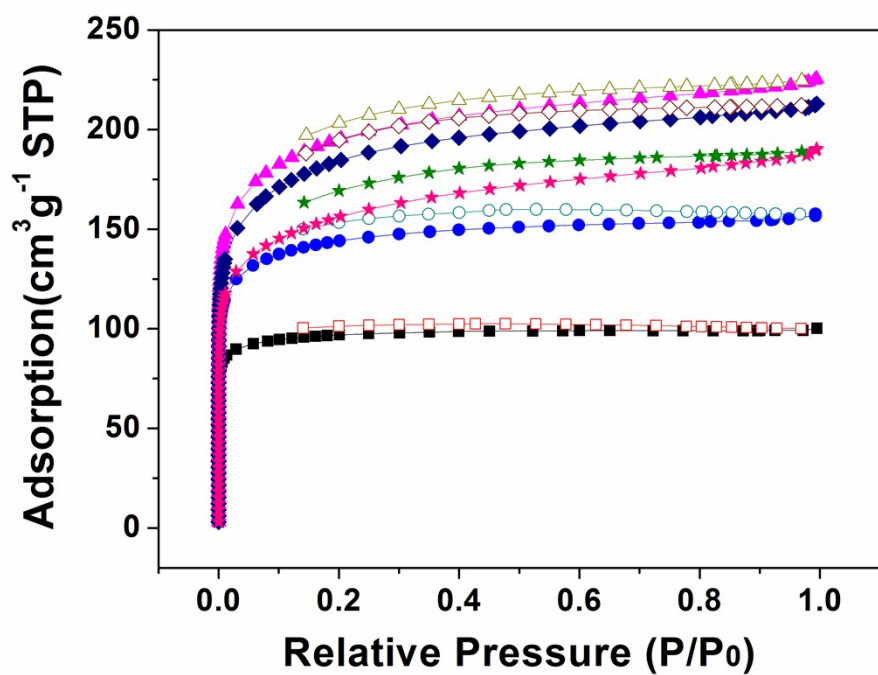

Fig. S10. Nitrogen adsorption and desorption isotherms at 77.3 K for all CTF-TBs derived from different ratios of ZnCl<sub>2</sub> to DCTB

(Filled symbols for adsorption and Unfilled symbols for desorption. Square: CTF-TB-1; Circle: CTF-TB-2; Triangle: CTF-TB-3; Diamond: CTF-TB-4; Star: CTF-TB-5)

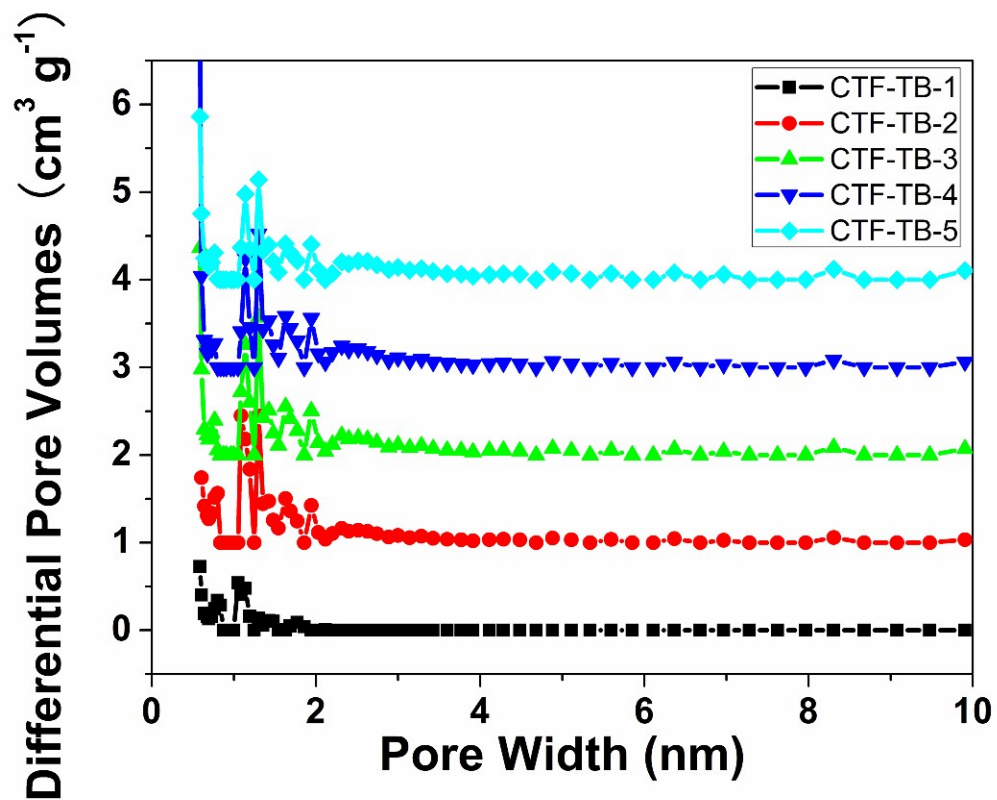

Fig. S11. Pore size distributions (PSD) calculated by the NLDFT method for all CTF-TBs derived from different ratios of ZnCl<sub>2</sub> to DCTB

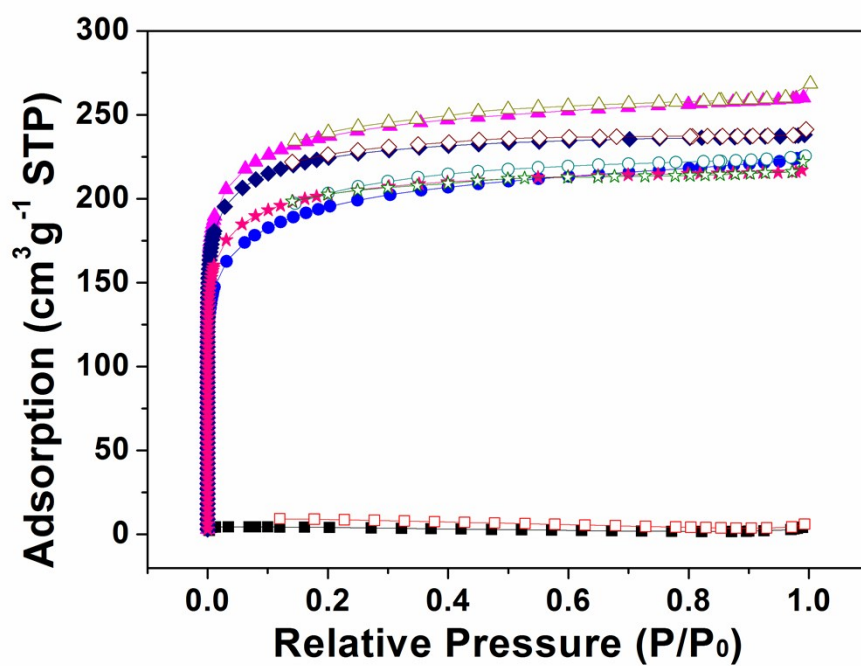

Fig. S12. Nitrogen adsorption and desorption isotherms at 77.3 K for all CTF-TBs obtained from different reaction temperatures (Filled symbols for adsorption and Unfilled symbols for desorption. Square: CTF-TB-6; Circle: CTF-TB-3; Triangle: CTF-TB-7; Diamond: CTF-TB-8; Star: CTF-TB-9)

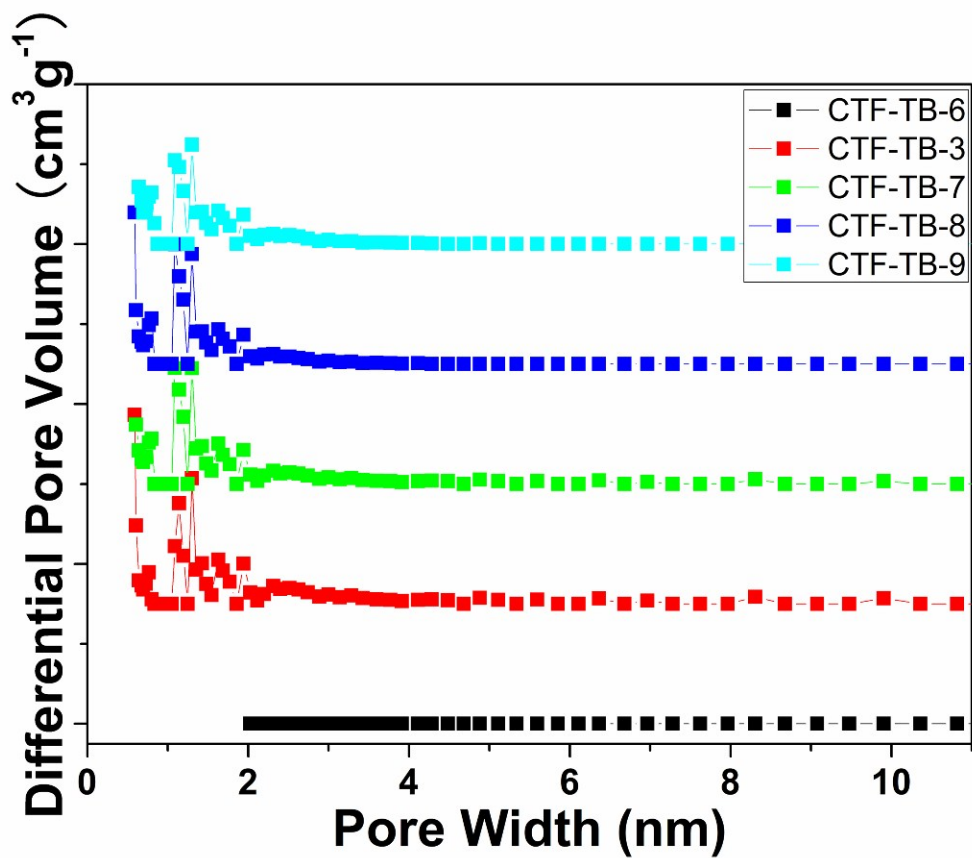

Fig. S13. Pore size distributions (PSD) calculated by the NLDFT method for all CTF-TBs obtained from different reaction temperatures

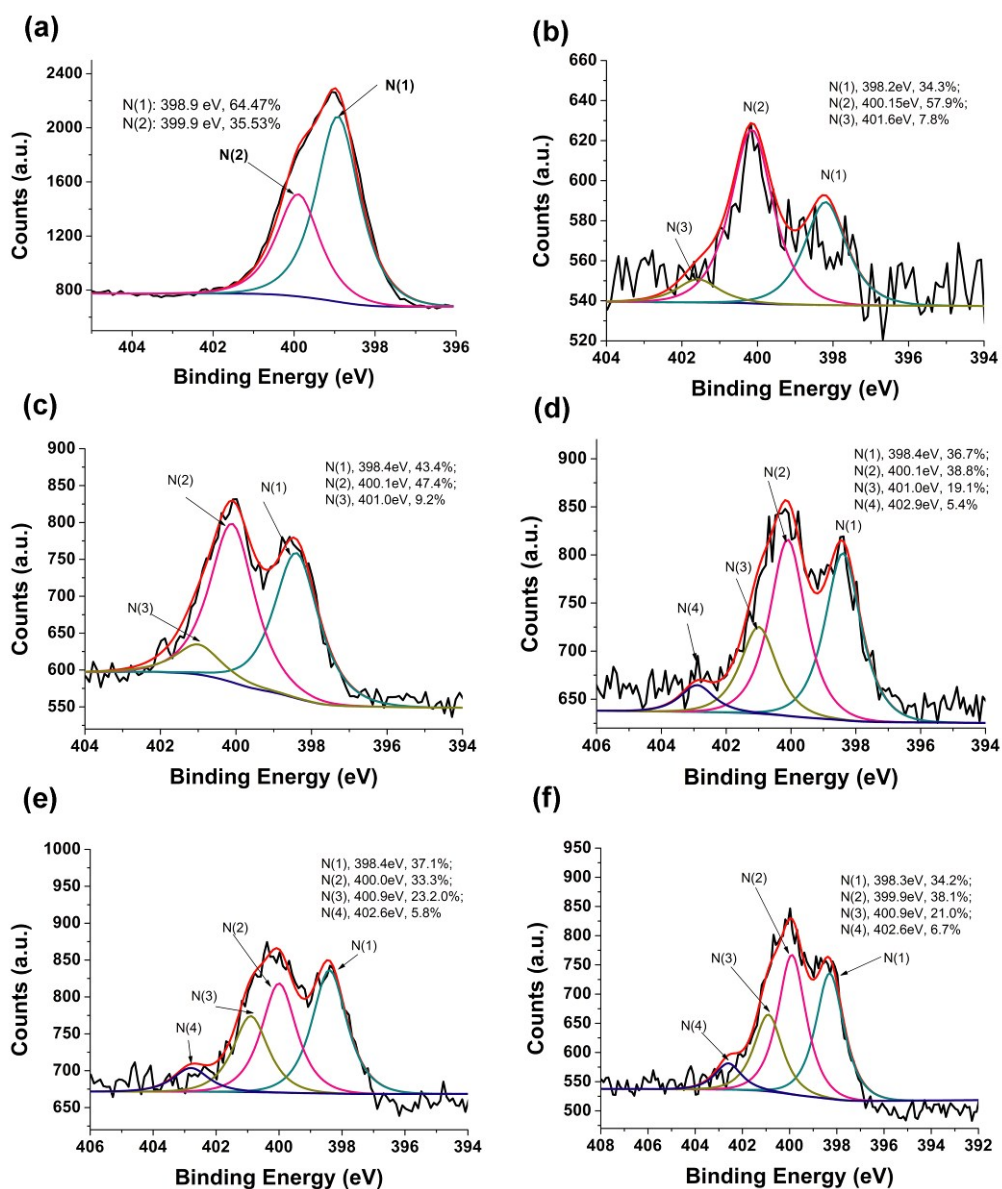

Fig. S14. High resolution N1s XPS spectra of (a) DCTB, (b) CTF-TB-6 (350 °C), (c) CTF-TB-3 (400 °C), (d) CTF-TB-7 (450 °C), (e) CTF-TB-8 (500 °C), and (f) CTF-TB-9 (550 °C)

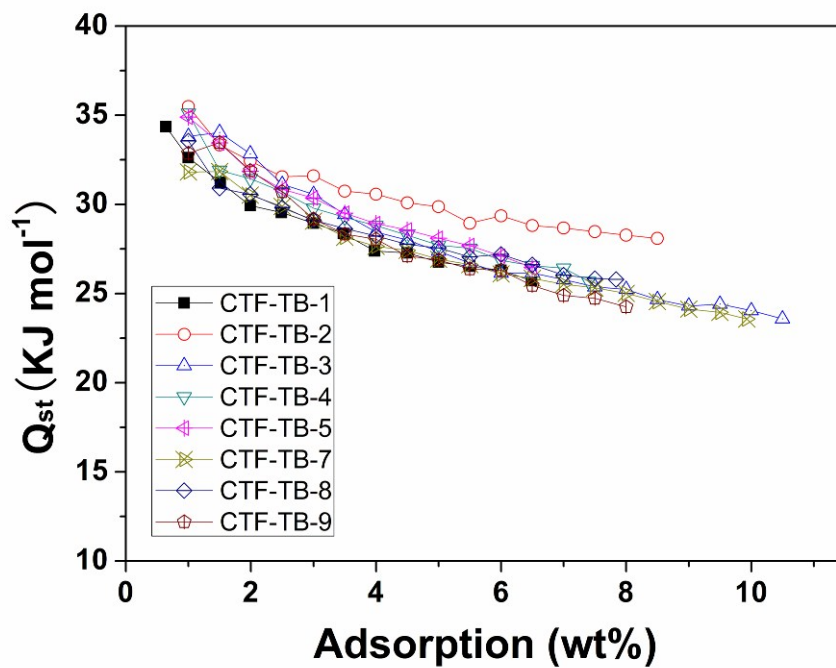

Fig. S15. Heats of adsorption for the CTF-TBs



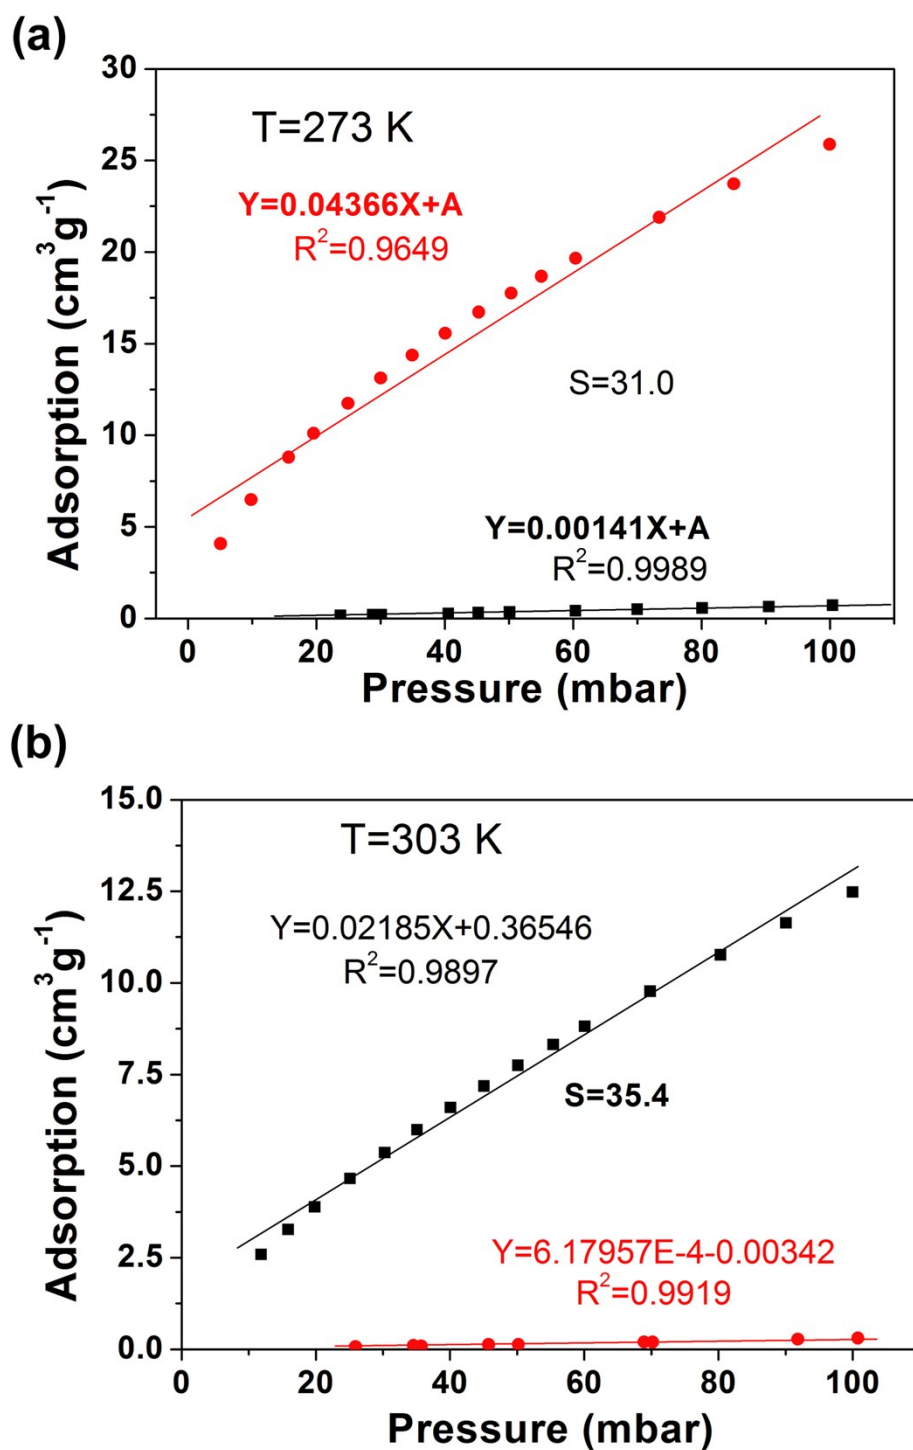

Fig. S16. Representative CO<sub>2</sub>/N<sub>2</sub> selectivity for CTF-TB-7 at (a) 273 K and (b) 303 K, calculated using the Henry's Law constants in the linear low pressure range (0~100 mbar)

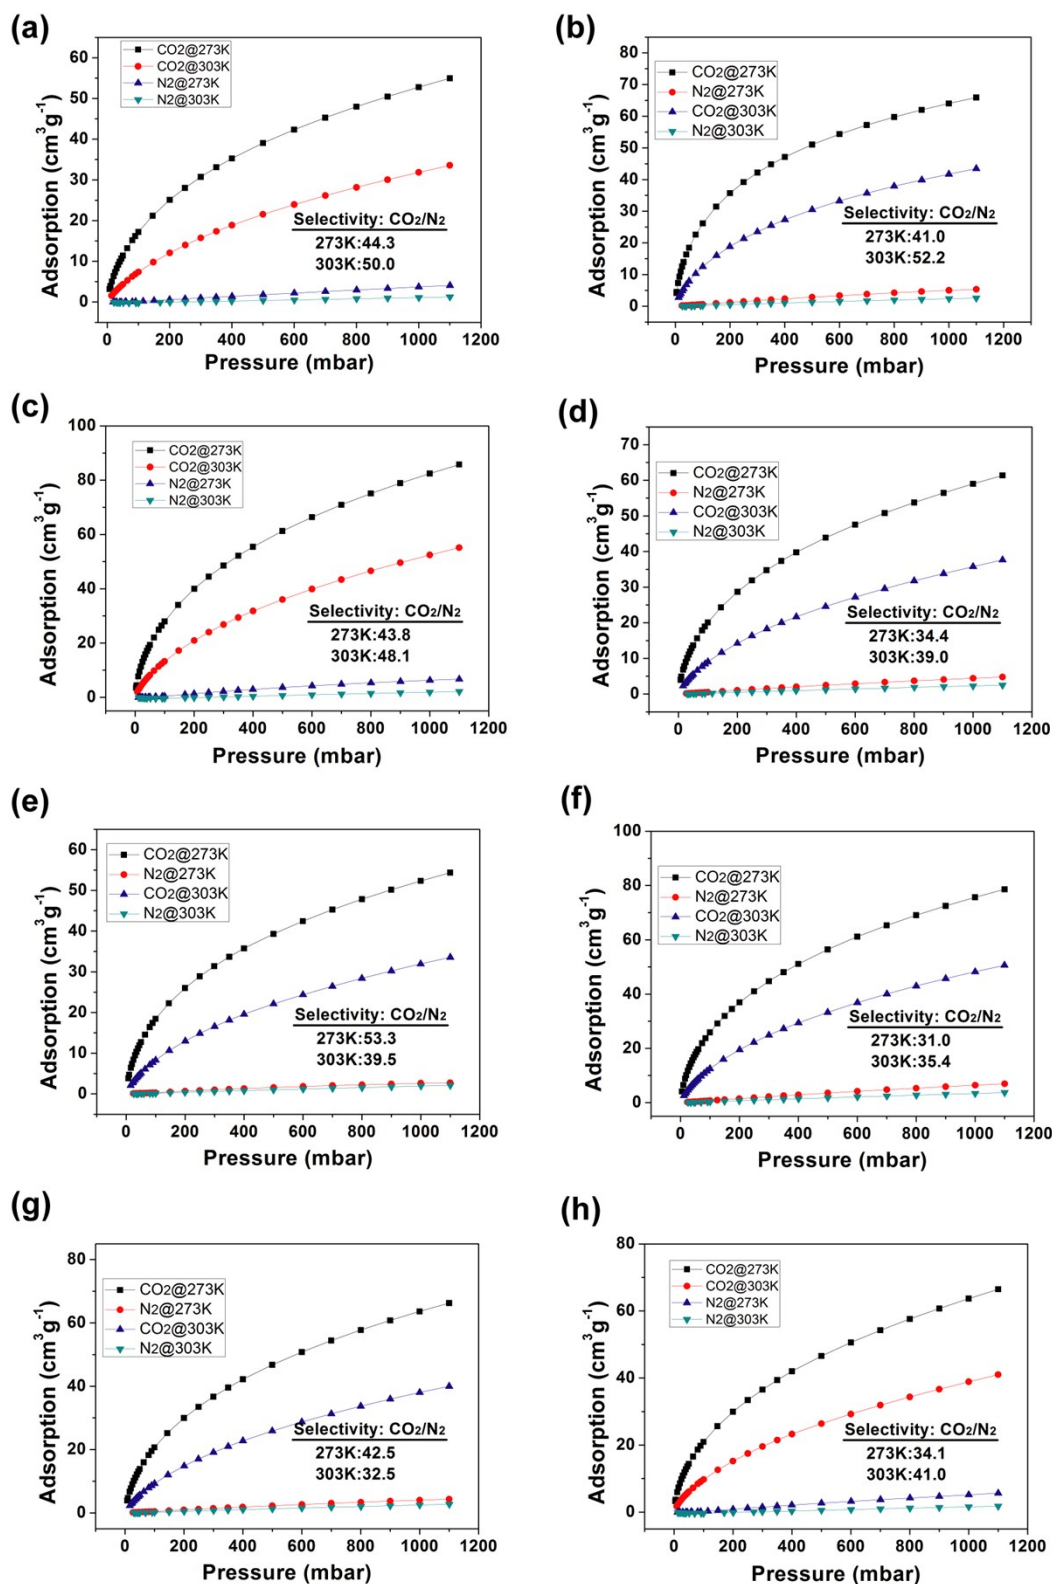

Fig. S17. CO<sub>2</sub>/N<sub>2</sub> selectivities for (a) CTF-TB-1, (b) CTF-TB-2, (c) CTF-TB-3, (d) CTF-TB-4, (e) CTF-TB-5, (f) CTF-TB-7, (g) CTF-TB-8, and (h) CTF-TB-9, calculated using the Henry's Law constants in the linear low pressure range (0~100 mbar)

Table S1 Elemental Analysis of the CTF-TBs

| Polymer Code      | N (%) | C (%) | H (%) |
|-------------------|-------|-------|-------|
| Calculated        | 20.58 | 74.98 | 4.440 |
| CTF-TB-6 (350 °C) | 11.82 | 75.12 | 3.735 |
| CTF-TB-3 (400 °C) | 11.75 | 69.50 | 3.071 |
| CTF-TB-7 (450 °C) | 10.53 | 67.67 | 2.560 |
| CTF-TB-8 (500 °C) | 10.11 | 66.80 | 2.995 |
| CTF-TB-9 (550 °C) | 8.52  | 62.67 | 2.801 |
